# Supplementary material for: β2 Integrin Antagonism, A Potential Mechanism To Sensitize CML Cells To Therapy As Revealed From Genetic Response To Radiation And LiCl
Source: Research Square preprint supplement (doi:10.21203/rs.3.rs-885452/v1), 2021-09-29
Supplement: Supplementary file 1 [file bfe062068d051ac1224f7e78.docx]

| Gene | Forward primer (5’ to 3’) | Reverse primer (5’ to 3’) |
| --- | --- | --- |
| Bcl-2 | CTTTGAGTTCGGTGGGGTCA | ATCCACAGGGCGATGTTGTC |
| Bax | CATGGGCTGGACATTGGACT | AAGTAGGAGAGGAGGCCGT |
| P53 | AGTCACGCAACATGACGGAG | CGGATAAGGTGCTGAGGAGG |
| β-Catenin | ACCCACCATCCCACTGGCCT | TGGCACCCTGCTCACGCAAA |
| CD18 | ACCAGCCCAGAGGTGACTGT | CTGCTCCTGGATGCACTCTGT |
| TGF-β | CACCGGAGAGCCCTGGATA | TGTACAGCTGCCGCACACA |
| PI3K | AGGATGCTATGCTTGCTCTG | AAGGATGTCTGCTGGTAATGG |
| CDC42 | CTCACCACCTTAGAGCAACC | AGCATCAGGCAACTCAAGC |
| IL7 | TGTCTTCTTCTGTGCTGGAG | GGACCTTGTTATGCTGTTGCA |
| GAPDH | GAAGGTGAAGGTCGGAGTC | GAAGATGGTGATGGGATTTC |
| IL8 | GTGCAGTTTTGCCAAGGA GT | TTATGAATTCTCAGCCCTCTT CAAAAACTTCTC |

# Supplementary File

# Table 1: Sequence of primers used for qPCR of corresponding genes.

**Availability of data and materials**

To analyze the effect of IR on CAMs in CML, the microarray data (GSE7505) of 8Gy irradiated K562 cells (K5628Gy) was extracted from NCI 60 cell line data (<https://dtp.cancer.gov/discovery_development/nci-60/>).

This was compared with microarray data of 8Gy exposed KG1a cells, whose “Minimum Information About a Microarray Experiment” (MIAME) compliant data were deposited in the GEO database (GSE73486) (<http://www.ncbi.nlm.nih.gov/geo/>).
